# Supplementary material
Source: Springer Nature journal article supplement (https://www.springermedizin.de/resource/supplementary/13756_2013_579_MOESM1_ESM.pdf/9683376)

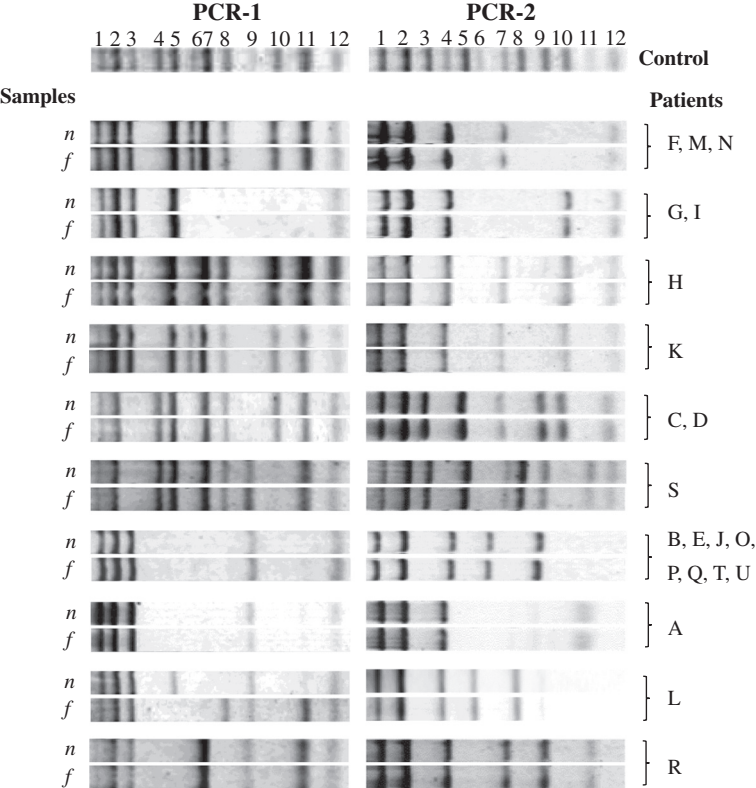

Supplement: MOESM1 [file 9683376]
